# Supplementary material for: Complete Chloroplast Genomes and Comparative Analyses of Three Paraphalaenopsis (Aeridinae, Orchidaceae) Species
Source: MDPI journal article supplement (doi:10.3390/ijms241311167), 2023-07-06
Supplement: s1 [file s1]

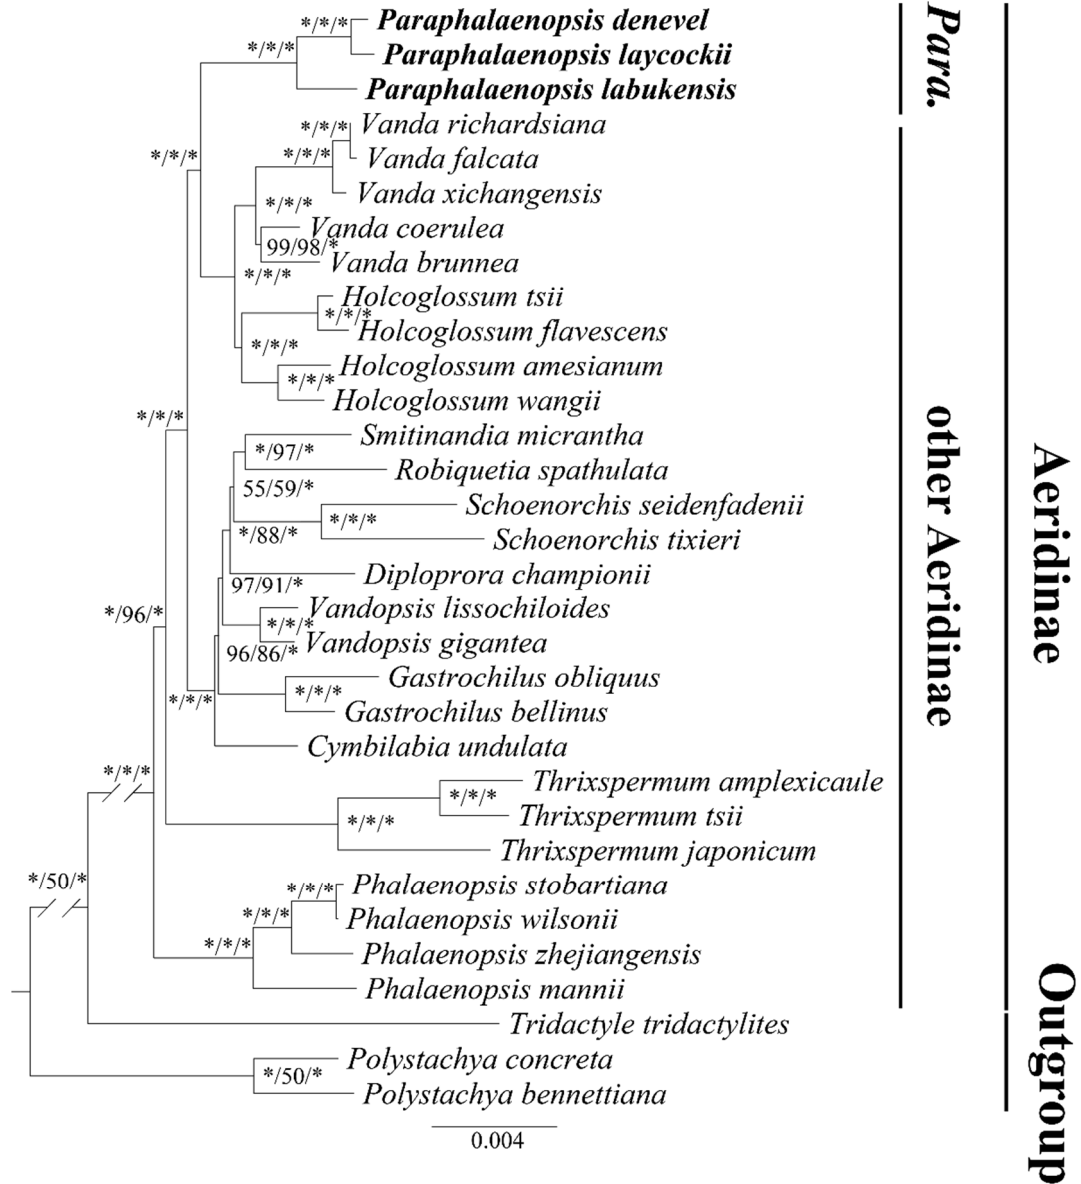

**Supplementary Figure S1.** Phylogenetic analysis of 28 Aeridinae species based on 68 protein coding genes. Numbers near the nodes are bootstrap percentages and Bayesian posterior probabilities (BSML left, BSMP middle, and PP right). - indicates that a node is inconsistent between the topology of the MP/ML trees and the Bayesian tree. \* indicates that the node is 100 bootstrap percentage or 1.00 posterior probability.

**Supplementary Table S1** Source and voucher information for this study. *P. labukensis* and *P. denevel* were introduced and cultivated in Shanghai Chen Shan Botanical Garden, Shanghai province, China. *P. laycockii* 'semi-alba' was introduced and cultivated in the China National Botanical Garden, Beijing province, China. And other voucher specimens were deposited in the herbariums of National Center for Biotechnology Information (NCBI).

| Species                                       | Source                 | Voucher        | GenBank accession numbers |
|-----------------------------------------------|------------------------|----------------|---------------------------|
| <i>Paraphalaenopsis denevel</i>               | This study             |                | OR159903                  |
| <i>Paraphalaenopsis labukensis</i>            | This study             |                | OR159902                  |
| <i>Paraphalaenopsis laycockii</i> 'semi-alba' | This study             |                | OR159904                  |
| <i>Holcoglossum wangii</i>                    | Li et al., 2019        | 13881          | NC041520                  |
| <i>Holcoglossum amesianum</i>                 | Li et al., 2019        | 9419           | NC041511                  |
| <i>Holcoglossum tsii</i>                      | Chen et al., 2020      | LDKAe67        | NC048459                  |
| <i>Holcoglossum flavescens</i>                | Li et al., 2019        | 8943           | NC041512                  |
| <i>Vanda falcata</i>                          | Kim et al., 2017       | PDBK 2014-0010 | KT726907                  |
| <i>Vanda richardsiana</i>                     | Kim et al., 2017       | PDBK 2014-0945 | KT726908                  |
| <i>Vanda xichangensis</i>                     | Liu et al., 2019       | Z.J. Liu 2747  | NC047197                  |
| <i>Vanda brunnea</i>                          | Li et al., 2019        | 13059          | NC041522                  |
| <i>Schoenorchis tixieri</i>                   | Liu et al., 2020       | Liu4123        | MN124407                  |
| <i>Schoenorchis seidenfadenii</i>             | Liu et al., 2020       | Liu5230        | MN124434                  |
| <i>Smitinandia micrantha</i>                  | Liu et al., 2020       | Liu21119       | MN124406                  |
| <i>Robiquetia spathulata</i>                  | Liu et al., 2020       | Liu5248        | MN124410                  |
| <i>Diploprora championii</i>                  | Liu et al., 2020       | Liu4480        | MN124409                  |
| <i>Vandopsis gisantea</i>                     | Liu et al., 2020       | Liu7990        | MN124403                  |
| <i>Vandopsis lissochiloides</i>               | Liu et al., 2020       | Lior070        | MN124443                  |
| <i>Gastrochilus obliquus</i>                  | Liu et al., 2020       | Liu4191        | MN124429                  |
| <i>Gastrochilus bellinus</i>                  | Liu et al., 2020       | Lior011        | MN124427                  |
| <i>Cymbilabia undulata</i>                    | Liu et al., 2020       | Lior078        | MN124402                  |
| <i>Phalaenopsis stobartiana</i>               | Zhou et al., 2021      | -              | NC059917                  |
| <i>Phalaenopsis wilsonii</i>                  | Wang et al., 2021      | -              | NC057488                  |
| <i>Phalaenopsis zhejiangensis</i>             | Jiang et al., 2021     | -              | MZ326749                  |
| <i>Phalaenopsis mannii</i>                    | Zhou et al., 2020      | HDL-YN2019-12A | NC050940                  |
| <b>Outgroup</b>                               |                        |                |                           |
| <i>Tridactyle tridactylites</i>               | D'hajjère et al., 2022 | -              | MW760855                  |
| <i>Polystachya bennettiana</i>                | Jiang et al., 2022     | -              | NC066148                  |
| <i>Polystachya concreta</i>                   | Jiang et al., 2022     | -              | NC066150                  |

**Supplementary Table S2.** The details information of long repeats.

| seq len | species    | <i>P. labukensis</i> | <i>P. denevel</i> | <i>P. laycockii</i> 'semi-alba' |
|---------|------------|----------------------|-------------------|---------------------------------|
| ≥40     | Complement | 0                    | 0                 | 0                               |
|         | Forward    | 5                    | 5                 | 7                               |
|         | Palindrome | 9                    | 7                 | 9                               |
|         | Reverse    | 2                    | 5                 | 1                               |
| 30-39   | Complement | 1                    | 2                 | 2                               |
|         | Forward    | 3                    | 6                 | 7                               |
|         | Palindrome | 9                    | 7                 | 8                               |
|         | Reverse    | 5                    | 11                | 6                               |
| 20-29   | Complement | 0                    | 0                 | 0                               |
|         | Forward    | 6                    | 3                 | 6                               |
|         | Palindrome | 4                    | 2                 | 3                               |
|         | Reverse    | 5                    | 1                 | 0                               |

**Supplementary Table S3.** The details information Small simple repeats.

| species                         | mono | di | tri | tetra | penta | hexa | total |
|---------------------------------|------|----|-----|-------|-------|------|-------|
| <i>P. laycockii</i> 'semi-alba' | 39   | 13 | 9   | 7     | 4     | 0    | 72    |
| <i>P. denevel</i>               | 49   | 13 | 10  | 2     | 3     | 1    | 78    |
| <i>P. labukensis</i>            | 47   | 9  | 4   | 6     | 3     | 2    | 71    |

| species                         | LSC | SSC | IR | total |
|---------------------------------|-----|-----|----|-------|
| <i>P. laycockii</i> 'semi-alba' | 51  | 15  | 6  | 72    |
| <i>P. denevel</i>               | 60  | 14  | 4  | 78    |
| <i>P. labukensis</i>            | 53  | 16  | 2  | 71    |

**Supplementary Table S4.** The nucleotide diversity of three *Paraphalaenopsis* Chloroplast genomes.

Sliding window test of nucleotide diversity ( $\pi$ ) in the *Paraphalaenopsis* chloroplast genomes.  
Win-dow length: 600 bp; step size: 200 bp.
